# Supplementary material for: PKCβ Positively Regulates RANKL-Induced Osteoclastogenesis by Inactivating GSK-3β
Source: PubMed Central journal article supplement — Mol Cells. 2014 Sep 26;37(10):747–52. doi: 10.14348/molcells.2014.0220 (PMC4213766; doi:10.14348/molcells.2014.0220), 2014-09-26
Supplement: molcell-37-10-747-supplementary.pdf [file molcell-37-10-747-supplementary.pdf]

## Supplementary data

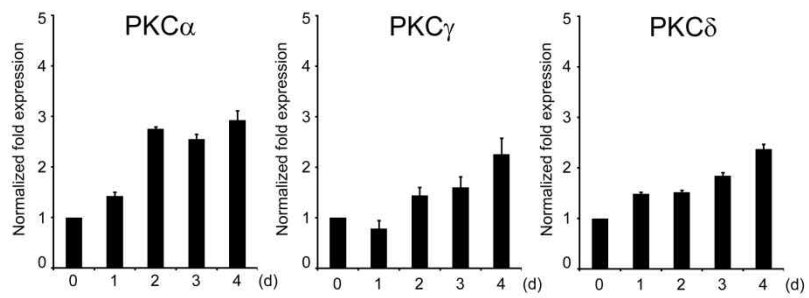

**Figure S1.** Expression level of PKC isoforms during RANKL-osteoclast differentiation.

BMMs were cultured with M-CSF and RANKL for the indicated time periods and expression level of PKC isoforms was analyzed for total mRNA by real-time PCR. GAPDH was used as an internal control for normalization. Data are means  $\pm$  S.D. of PKC isoform/GAPDH.

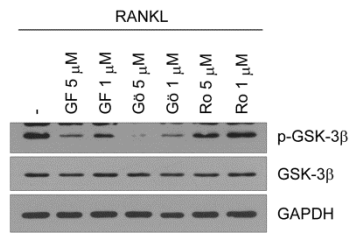

**Figure S2.** Inhibiting PKC $\alpha$  and  $\beta$  decreased GSK-3 $\beta$  phosphorylation in response to RANKL.

Effects of PKC inhibitors on GSK-3 $\beta$  phosphorylation at Ser-9. BMMs were cultured with M-CSF and RANKL for 2 days. The PKC inhibitors, GF109203X, Gö6976, and Rottlerin were added 1 h prior to harvest. Whole cell lysates were analyzed by Western blotting using specific antibodies for p-GSK-3 $\beta$ , GSK-3 $\beta$ , and NFATc1. Anti-GAPDH was used as the loading control.

**Table S1.** Real-time PCR primers

| Gene  | Forward                        | Reverse                        |
|-------|--------------------------------|--------------------------------|
| PRKCA | 5'-CCCATTCAGGAAGGAGATGA-3'     | 5'-TTCCTGTCAGCAAGCATCAC-3'     |
| PRKCB | 5'-TCCCTGATCCCAAAGTGAG-3'      | 5'-AACTGAACCAGCCATCCAC-3'      |
| PRKCG | 5'-ACCAGGGCATCATCTACAGG-3'     | 5'-CTCCTCATCTTCCCCATCA-3'      |
| PRKCD | 5'-CAGACCAAGGACCACCTGTT-3'     | 5'-GCATAAACGTAGCCCGGTA-3'      |
| Actb  | 5'-TGGAATCCTGTGGCATCCATGAAA-3' | 5'-TAAAACGCAGCTCAGTAACAGTCC-3' |
